# Supplementary material
Source: PubMed Central journal article supplement (PMC5940336)

**A**

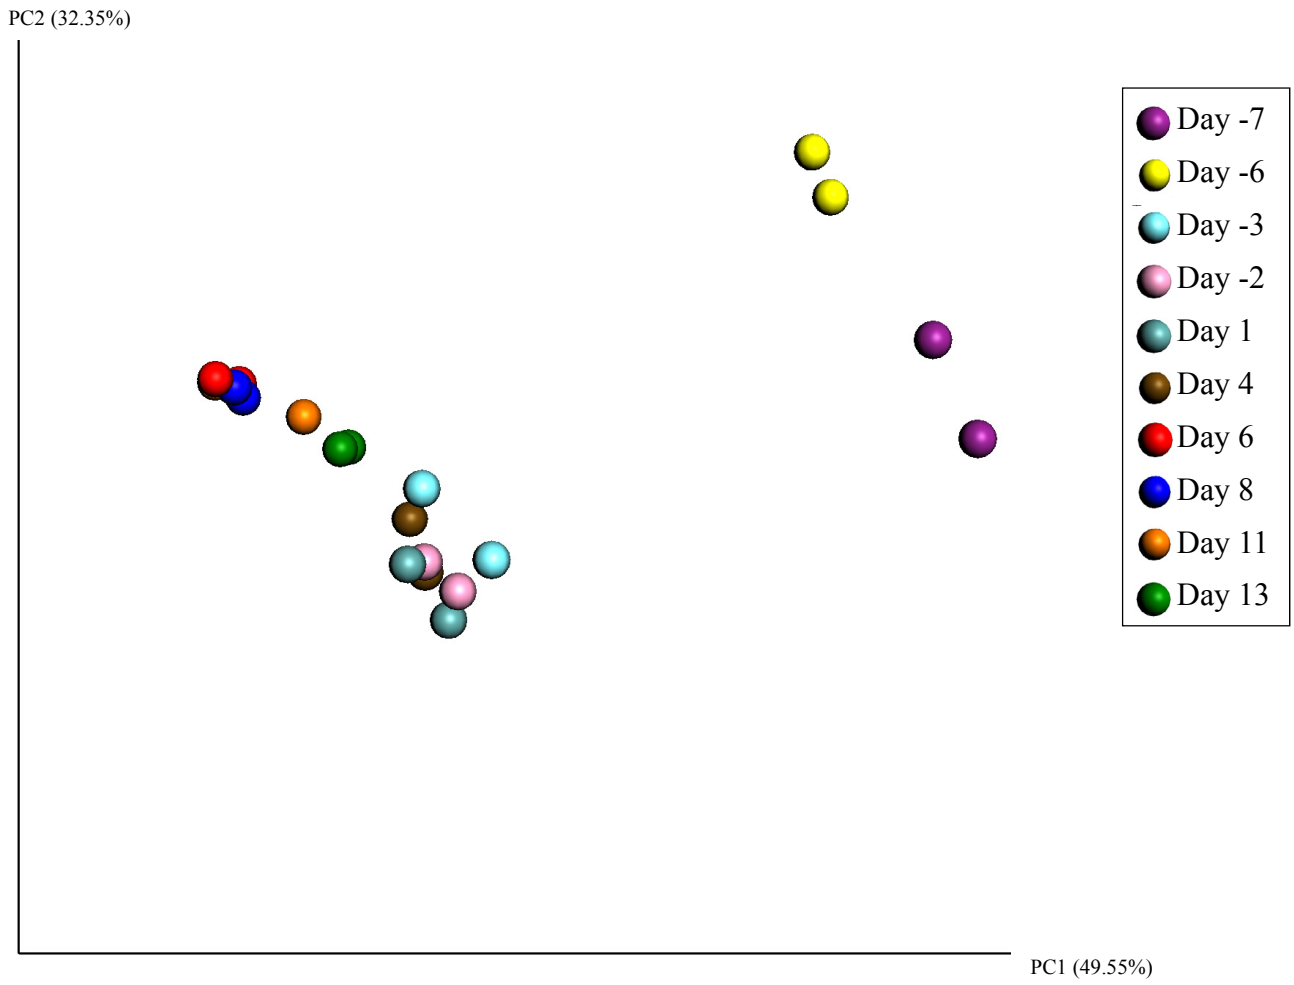

**B**

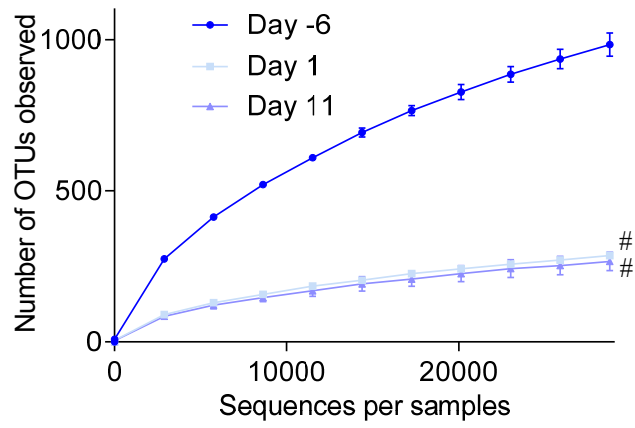

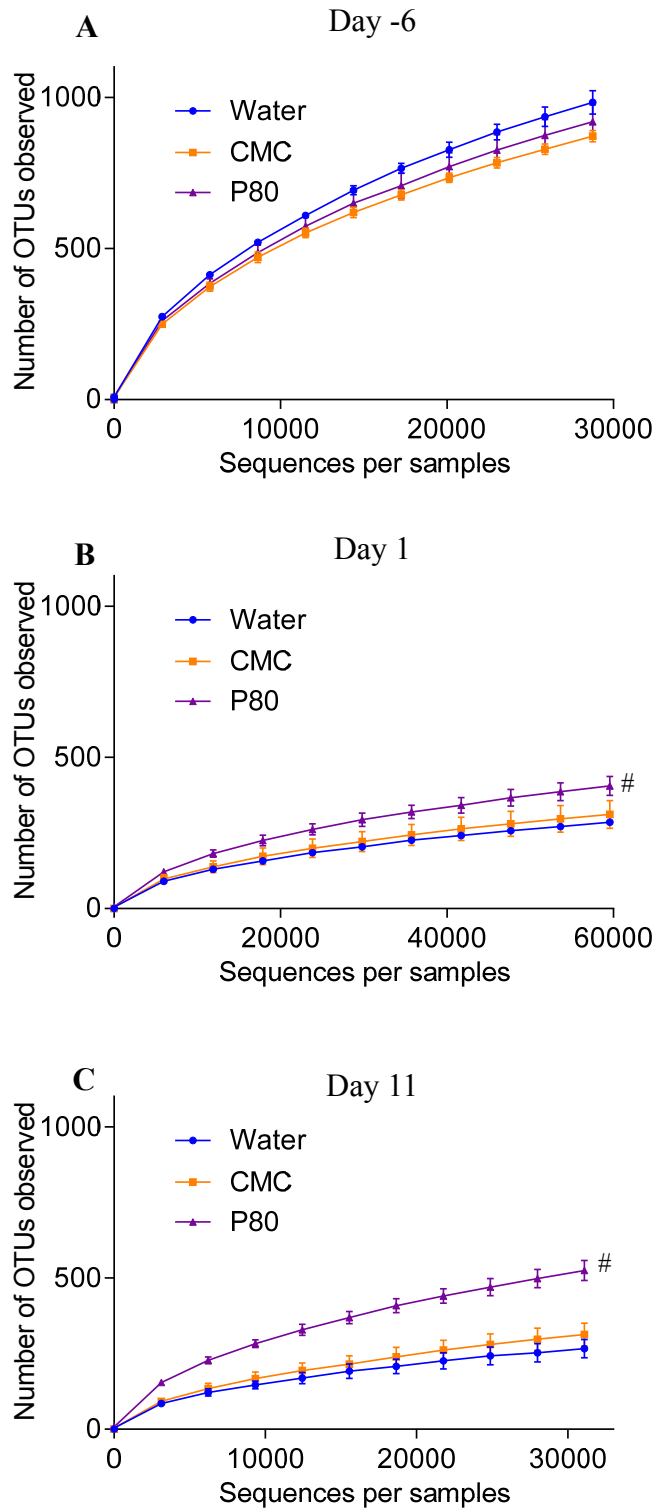

Chassaing et al., Figure S2.

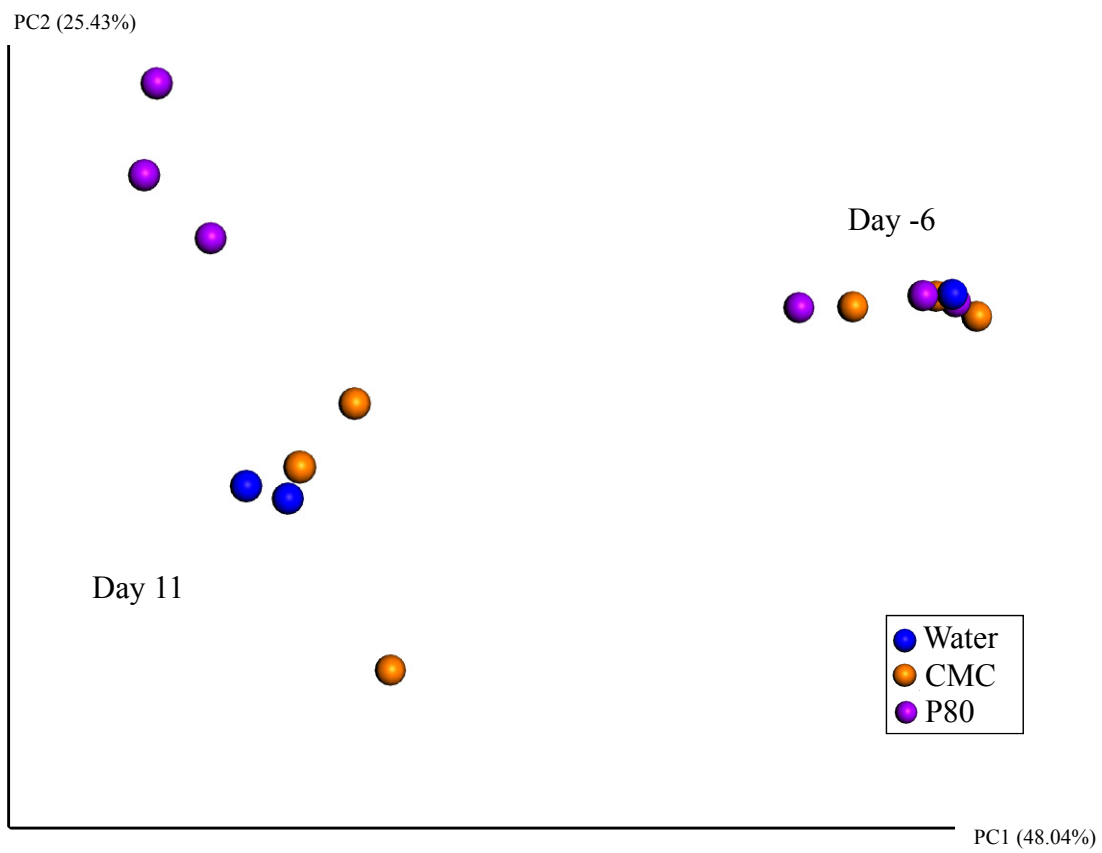

Chassaing et al., Figure S3.

### A Day 1 versus Day -6

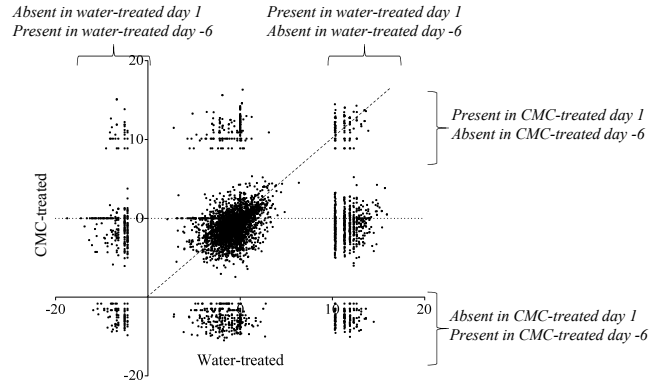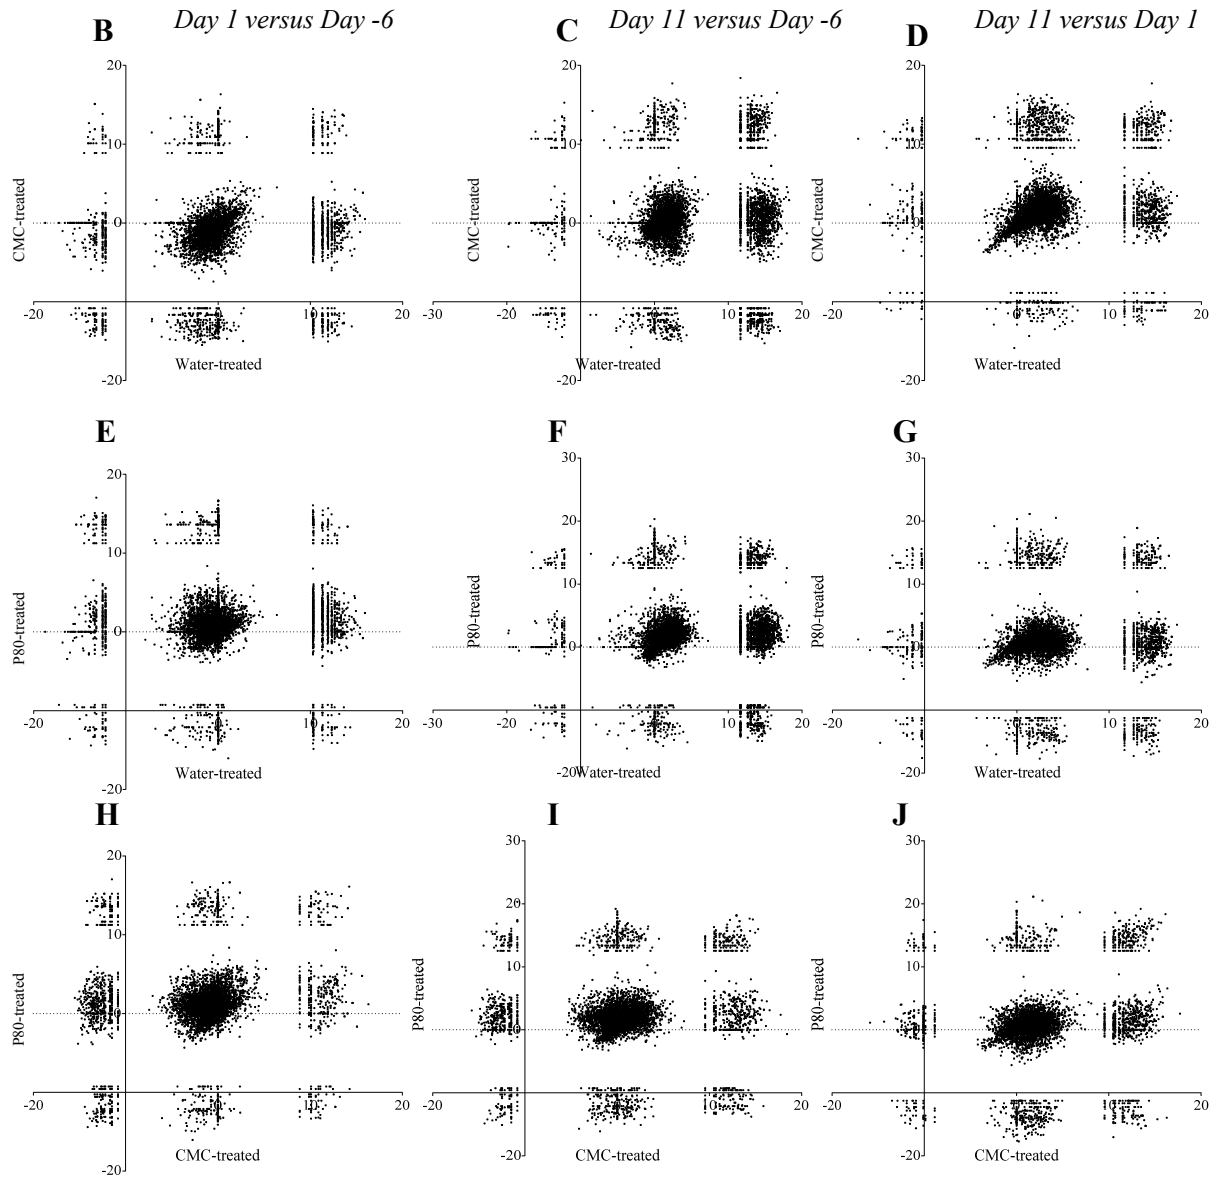

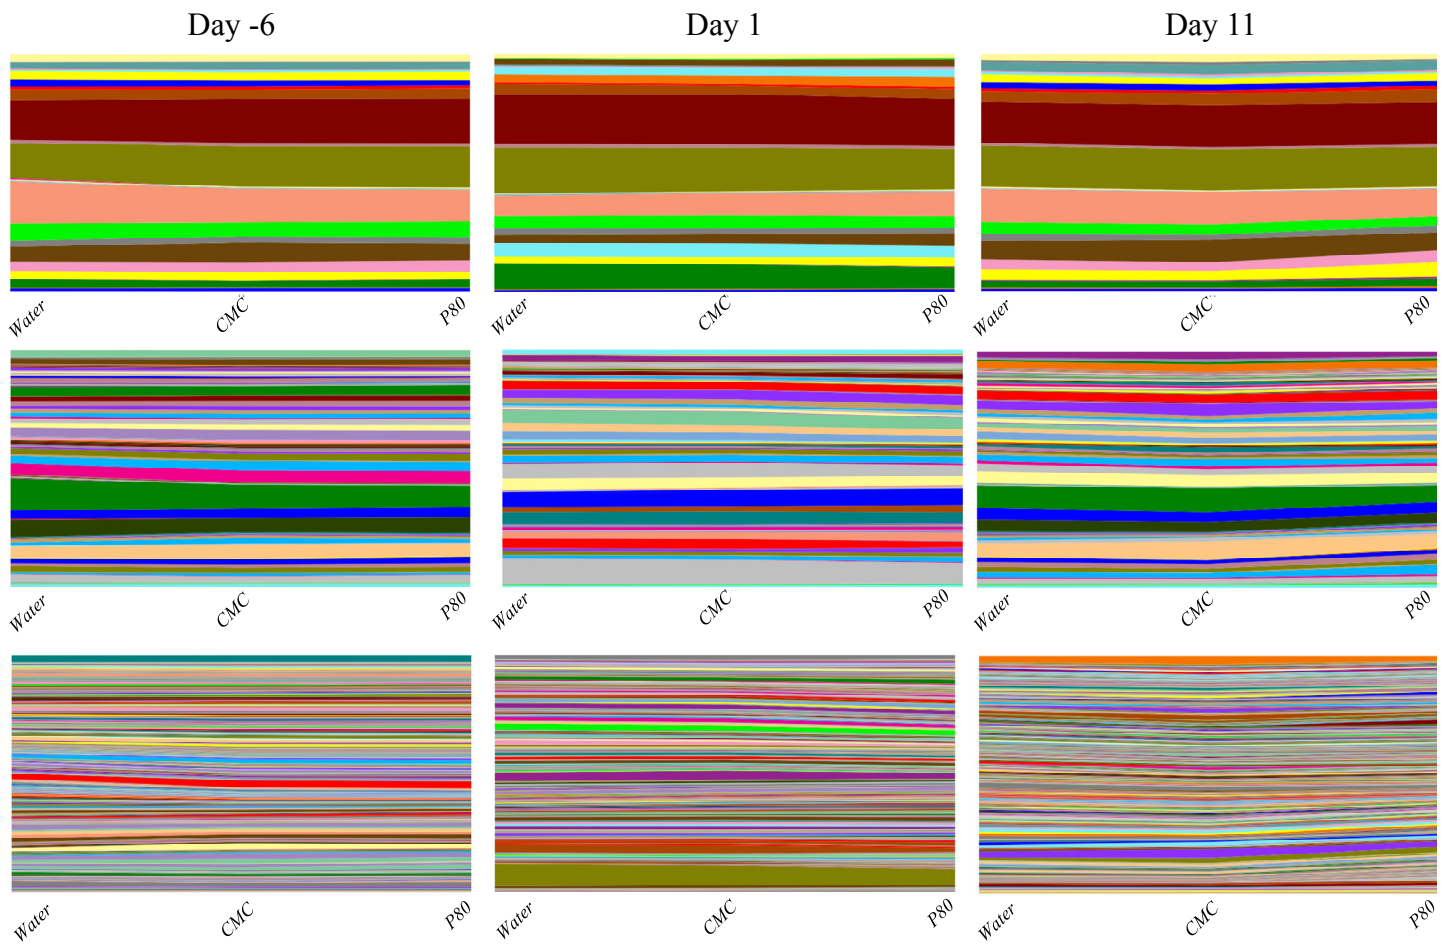

Chassaing et al., Figure S5.

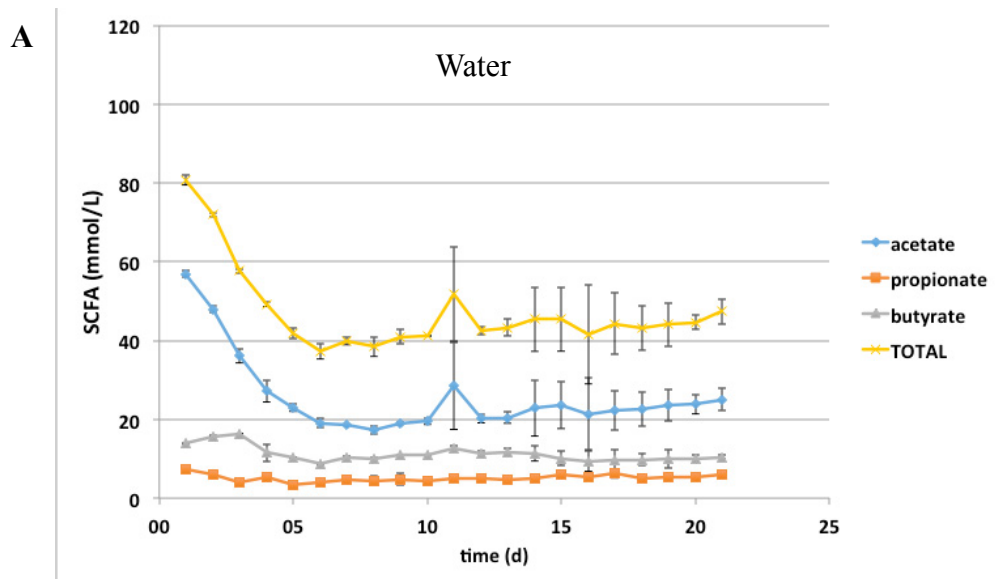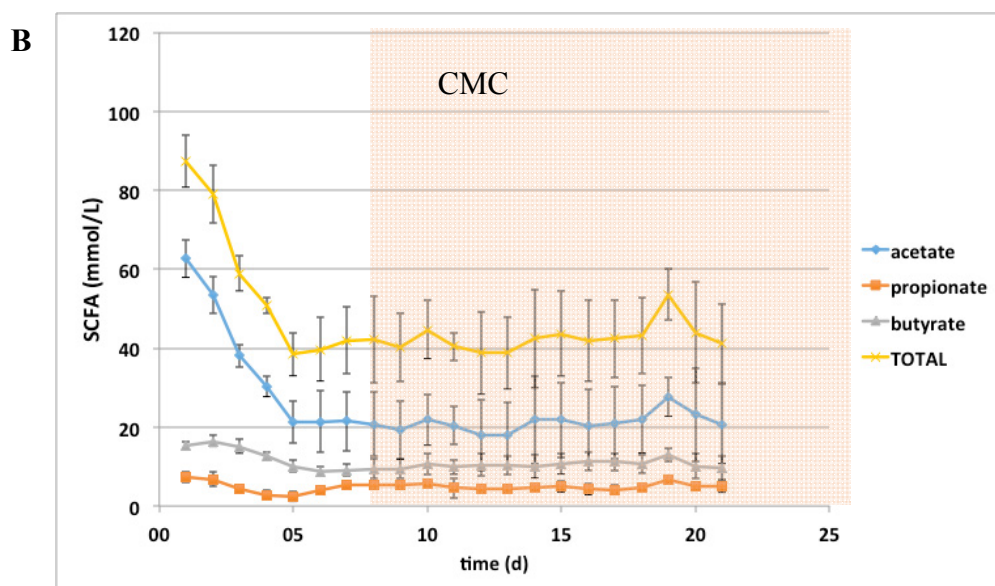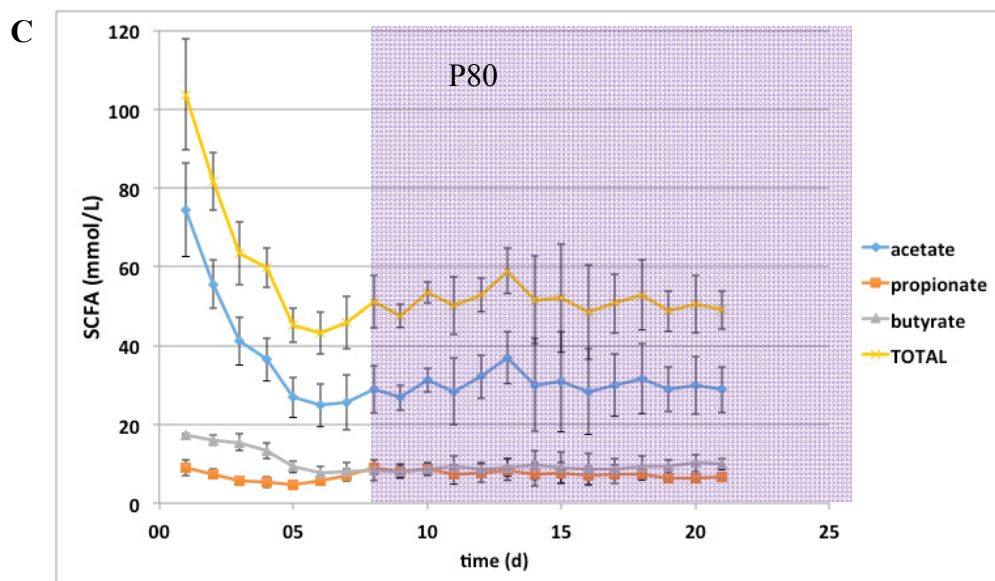

Chassaing et al., Figure S6.

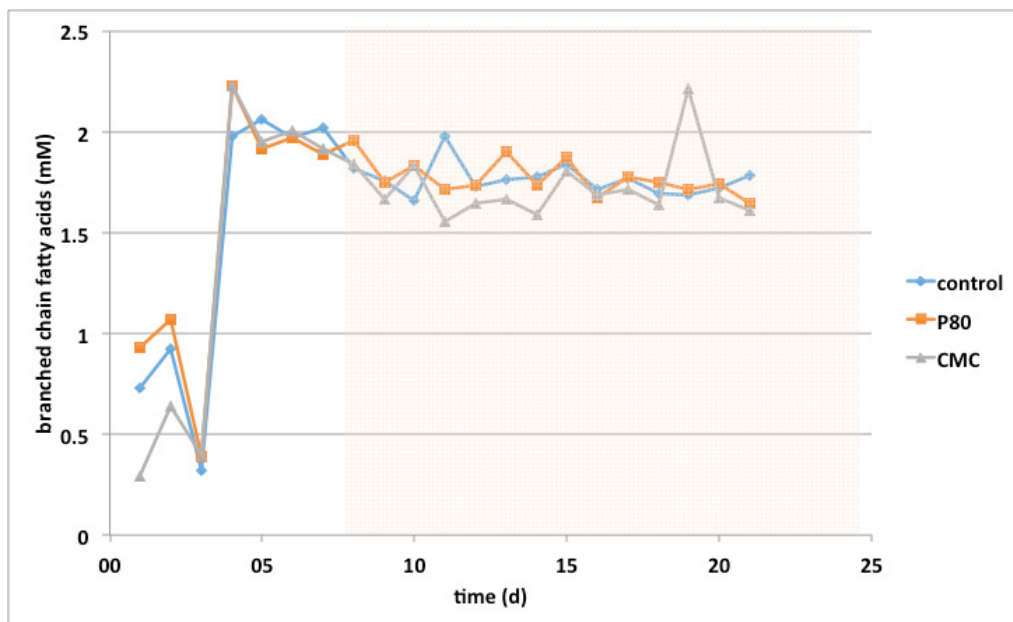

Chassaing et al., Figure S7.

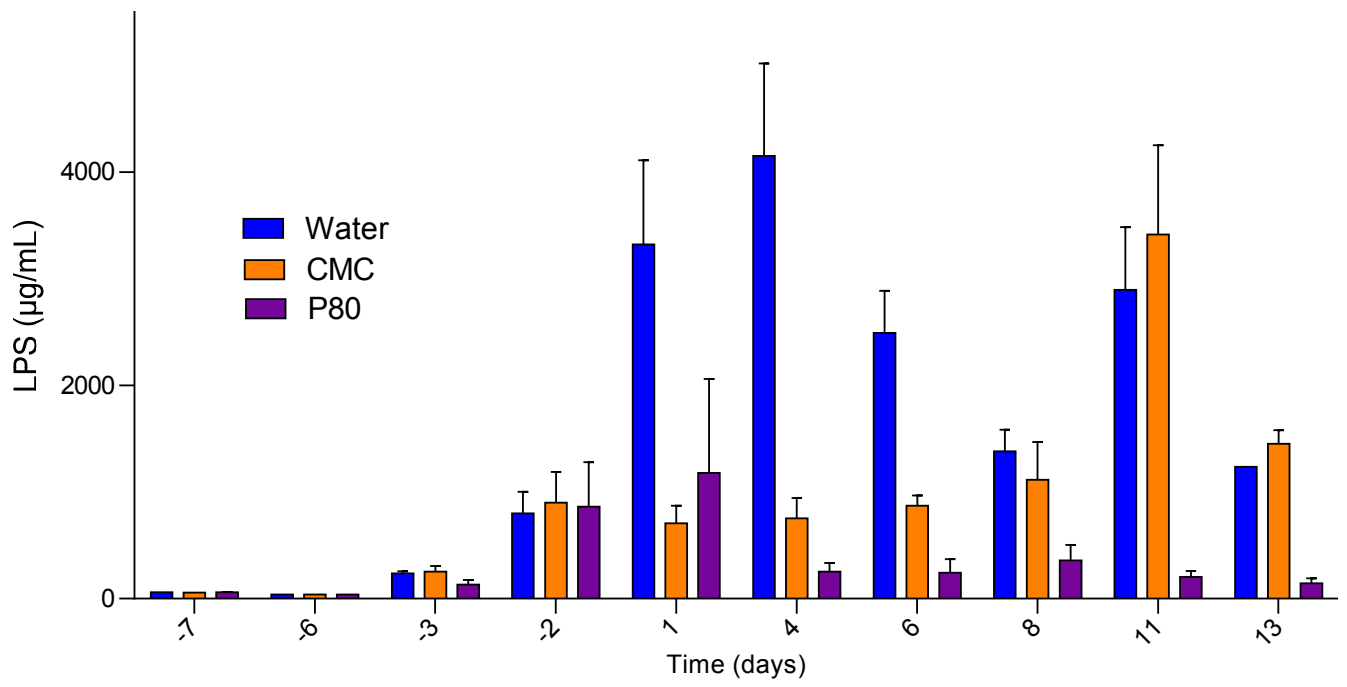

Chassaing et al., Figure S8.



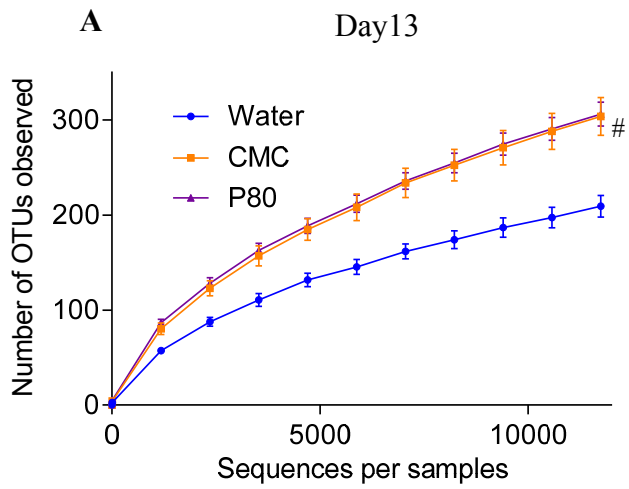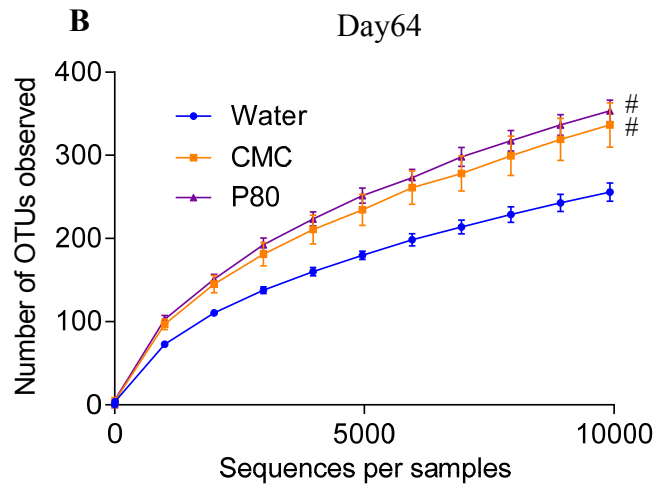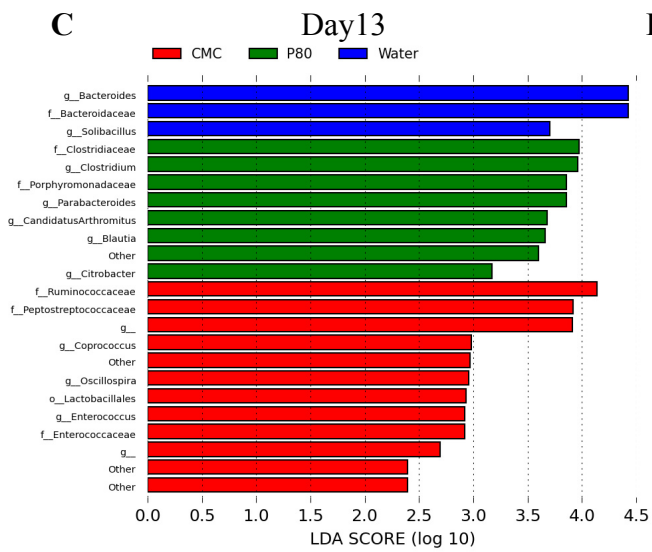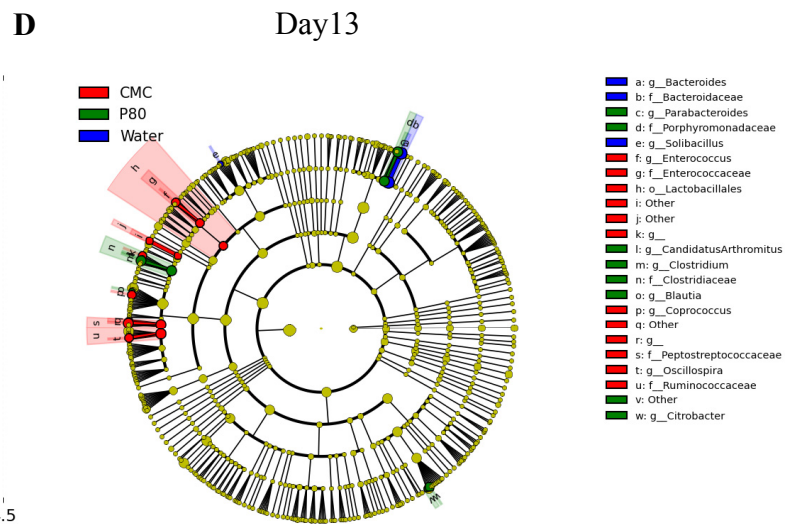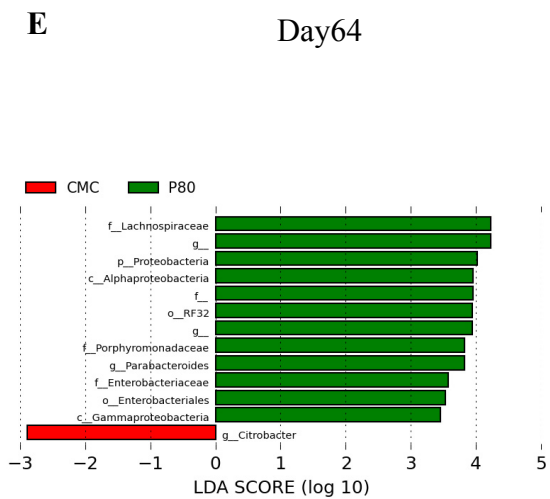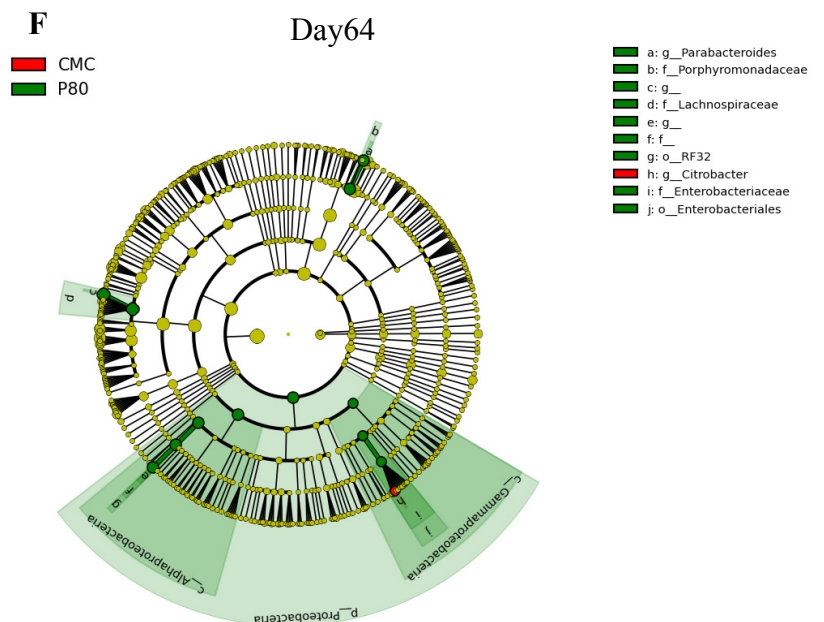

Chassaing et al., Figure S9.

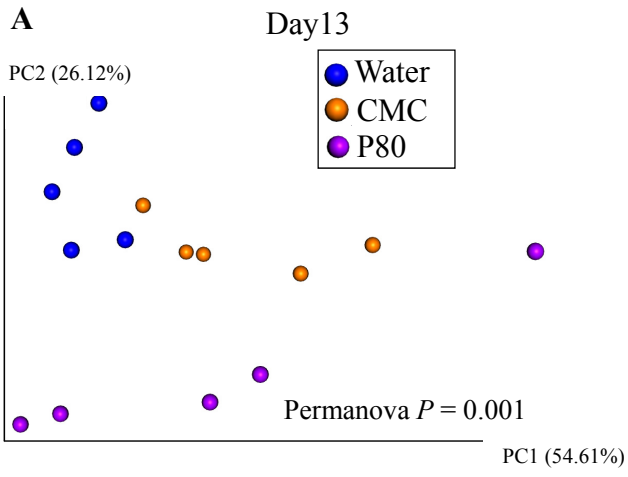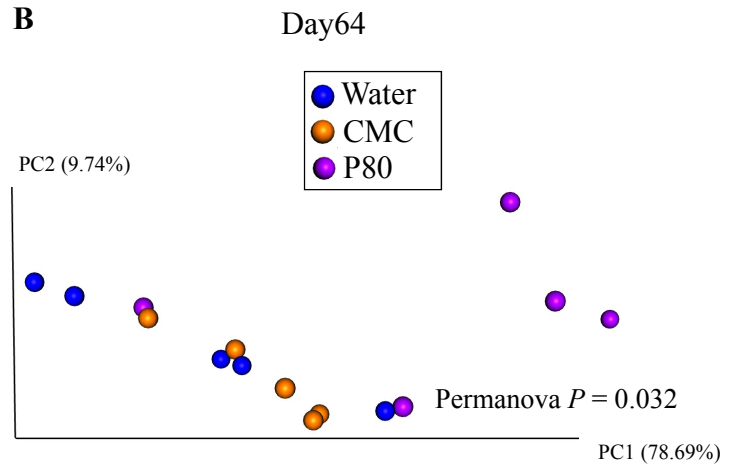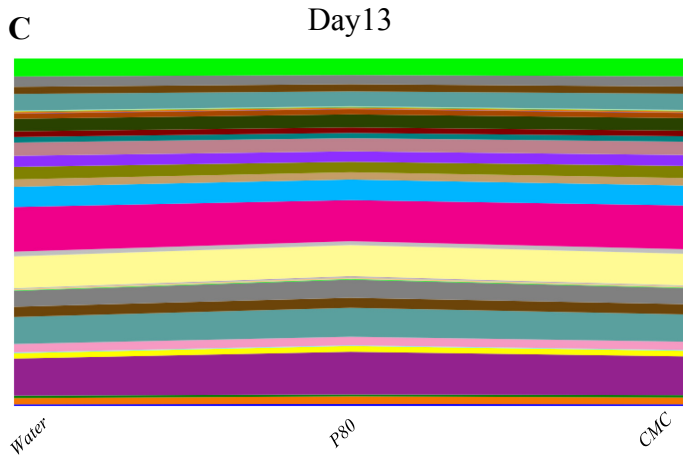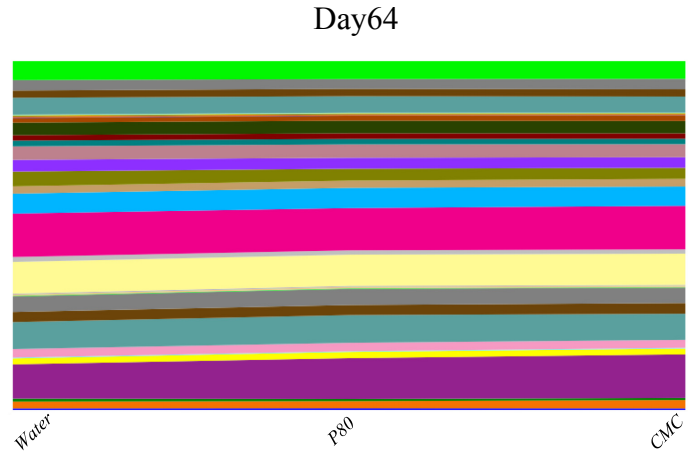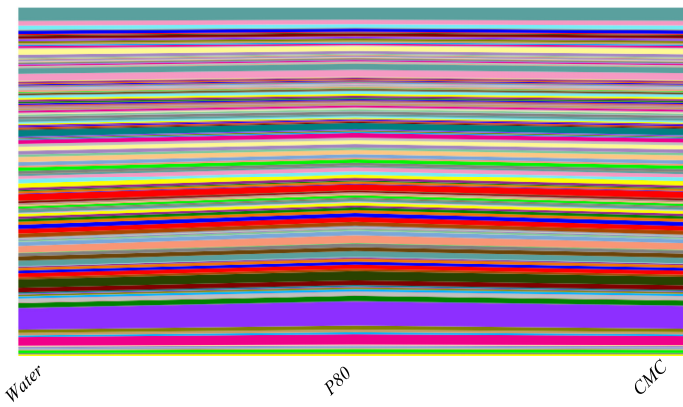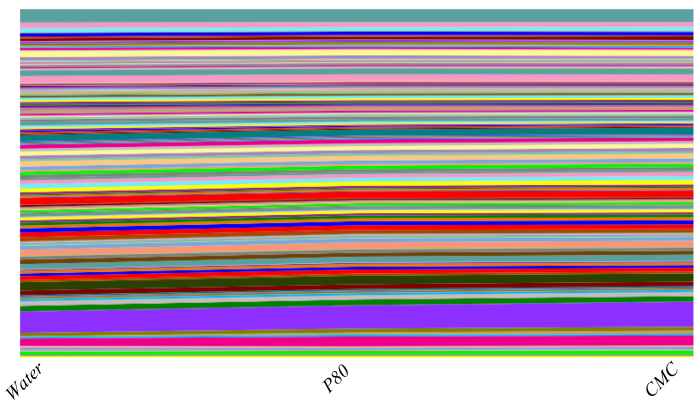

Chassaing et al., Figure S10.

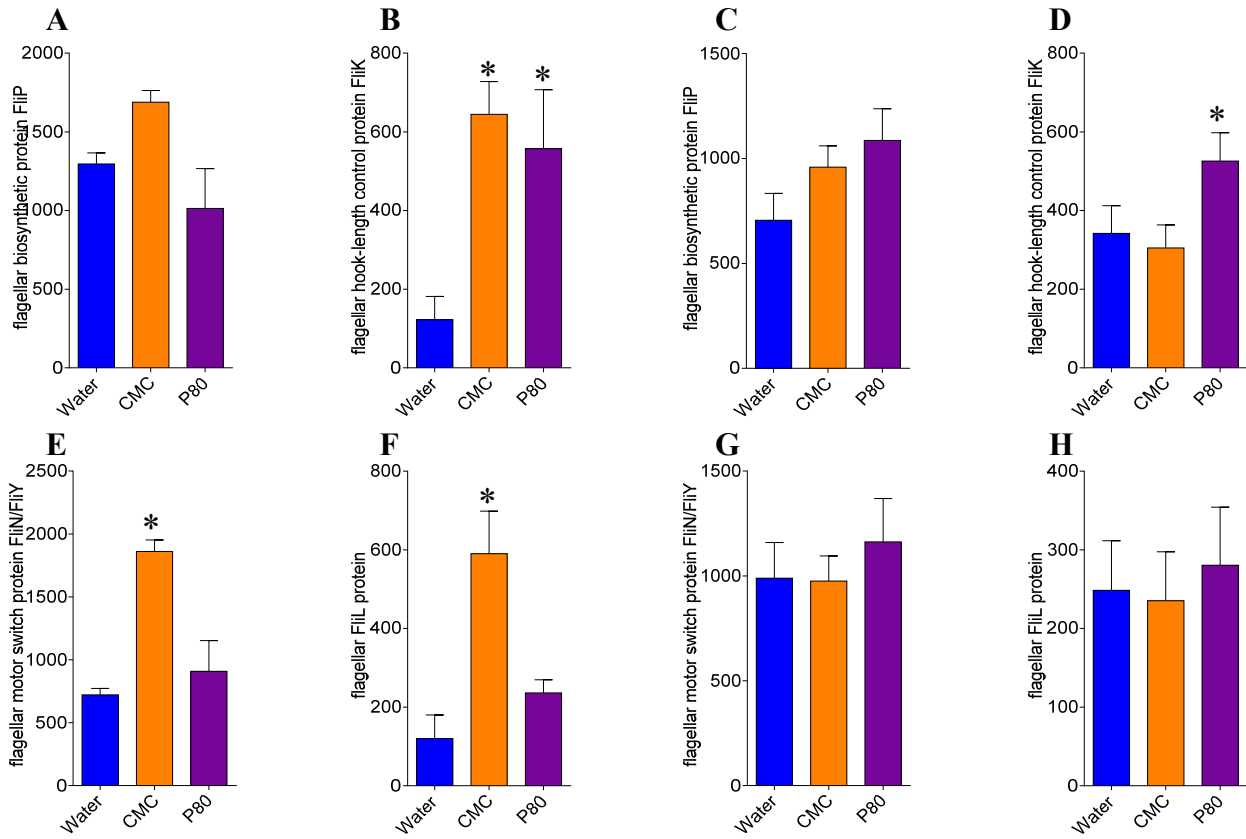

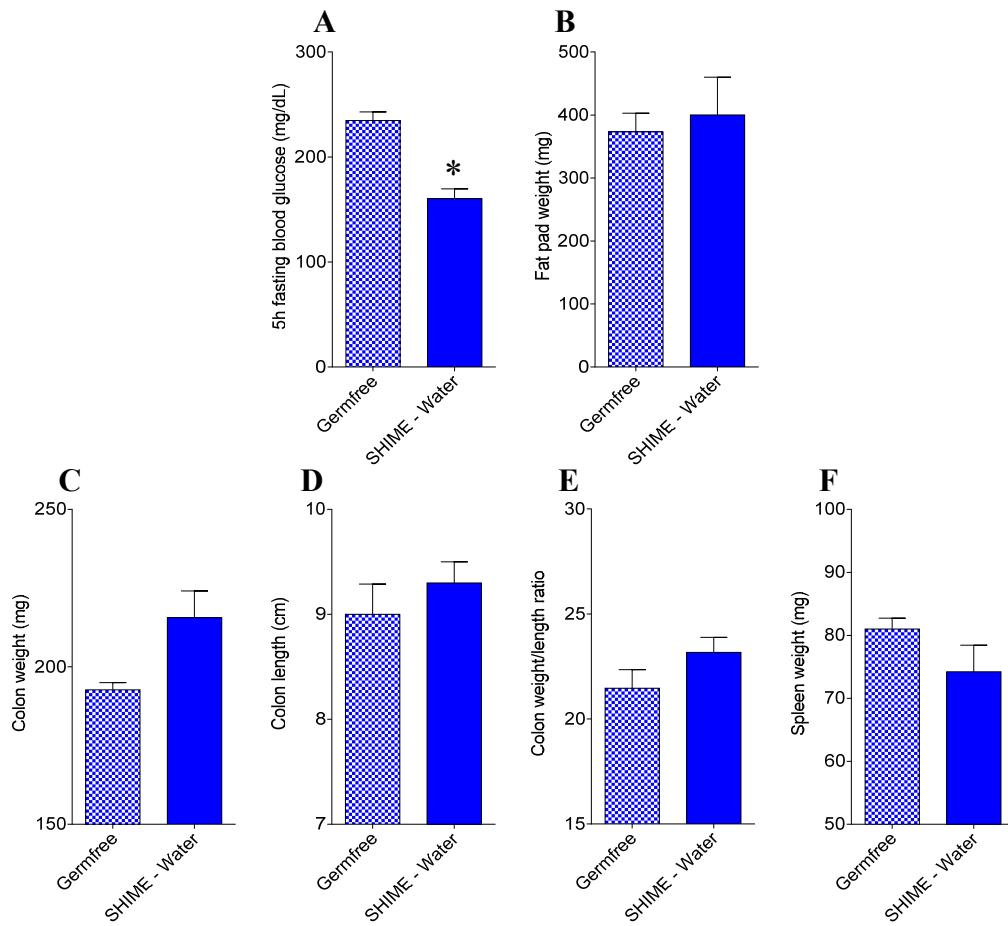

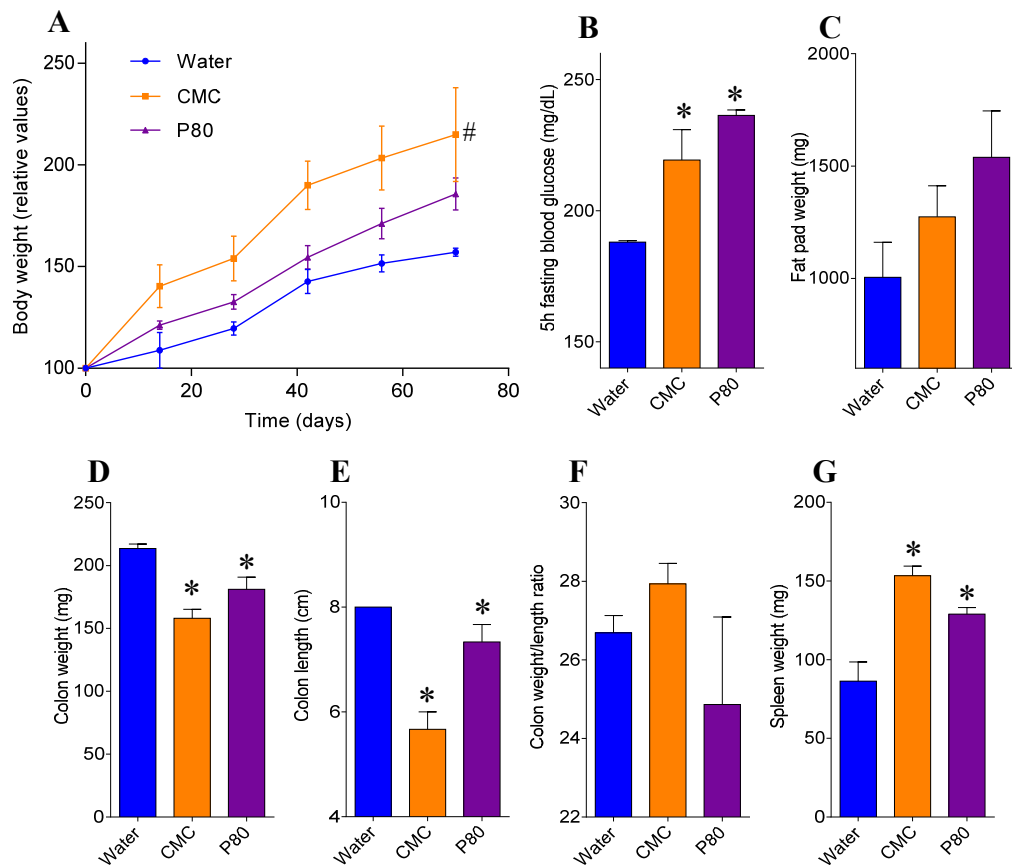

Supplement: NIHMS880956-supplement-supp_figs.pdf [file NIHMS880956-supplement-supp_figs.pdf]
